# Supplementary material for: cAMP Signals in Drosophila Motor Neurons Are Confined to Single Synaptic Boutons
Source: PubMed Central journal article supplement — Cell Rep. 2016 Oct 25;17(5):1238–46. doi: 10.1016/j.celrep.2016.09.090 (PMC5098120; doi:10.1016/j.celrep.2016.09.090), 2016-10-25
Supplement: mmc1.pdf [file mmc1.pdf]

Cell Reports, Volume 17

## Supplemental Information

### **cAMP Signals in *Drosophila* Motor Neurons Are Confined to Single Synaptic Boutons**

Isabella Maiellaro, Martin J. Lohse, Robert J. Kittel, and Davide Calebiro

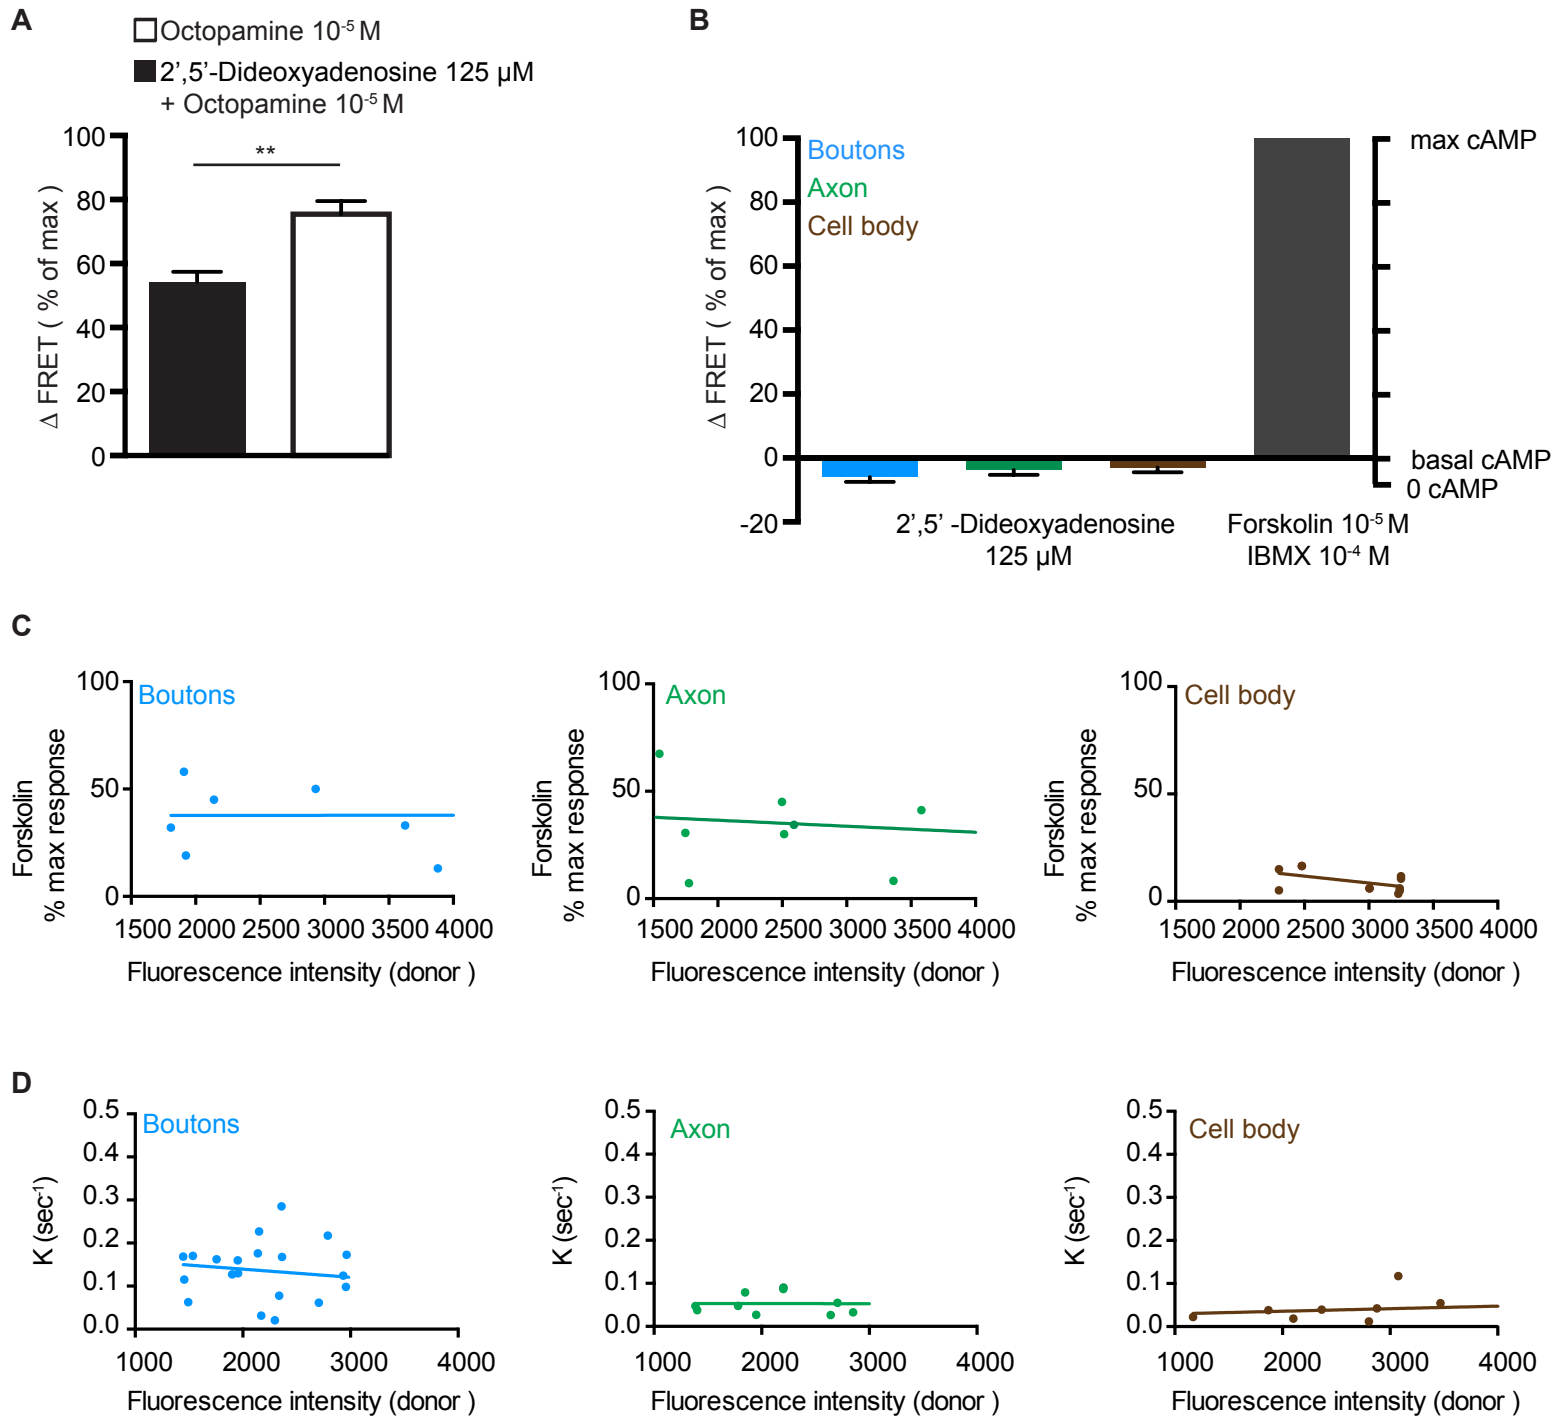

**Figure S1 Related to Figure 1**

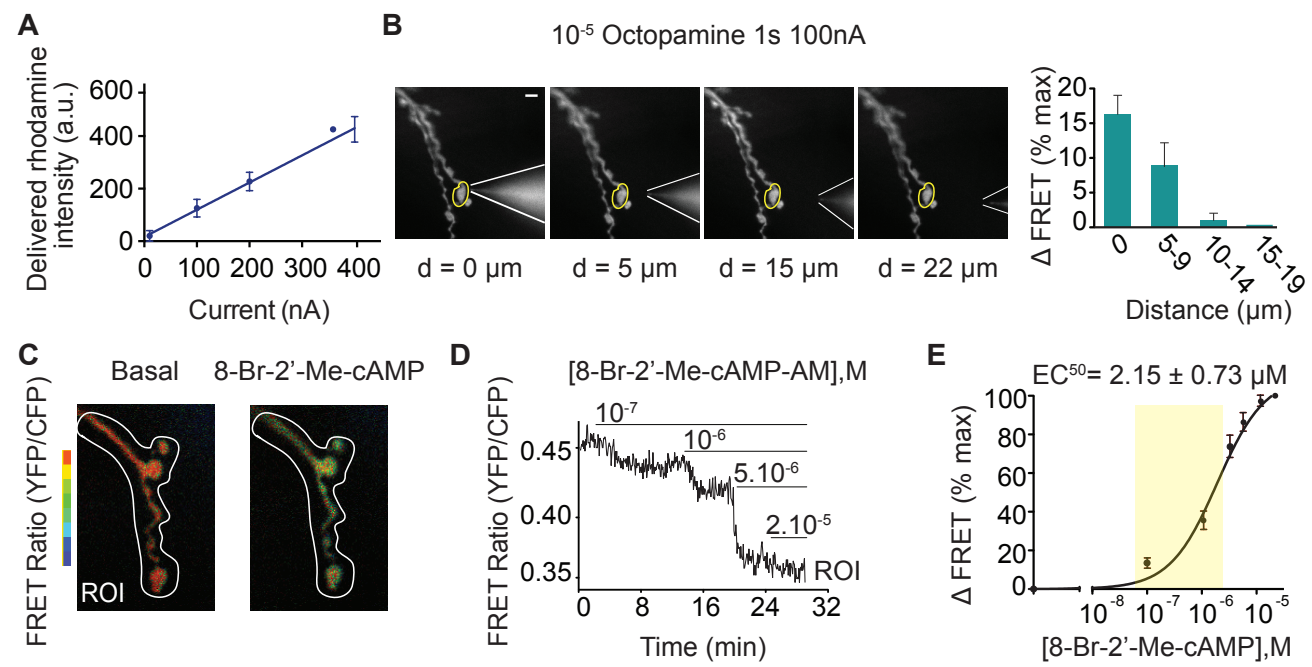

**Figure S2 Related to Figure 2**

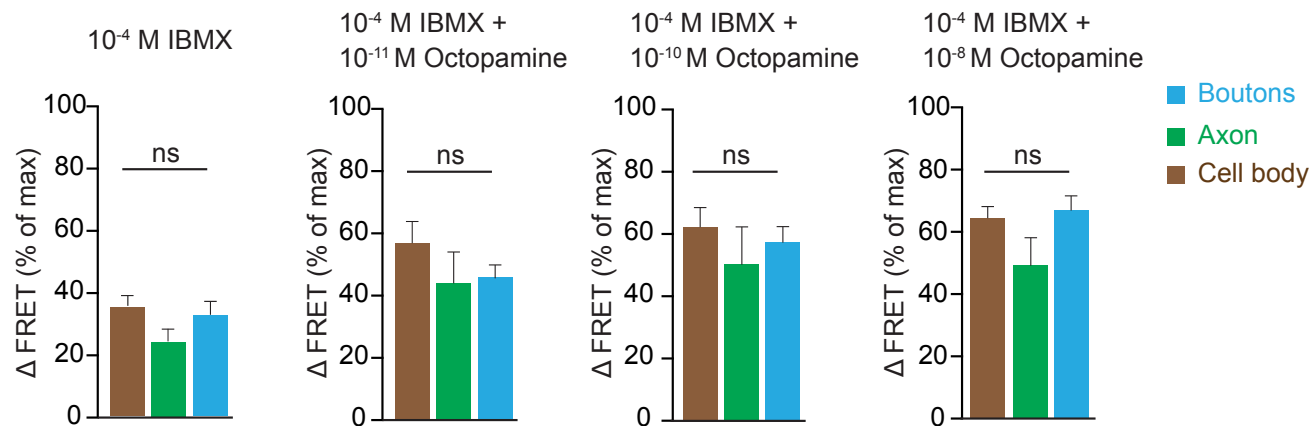

**Figure S3 Related to Figure 3**

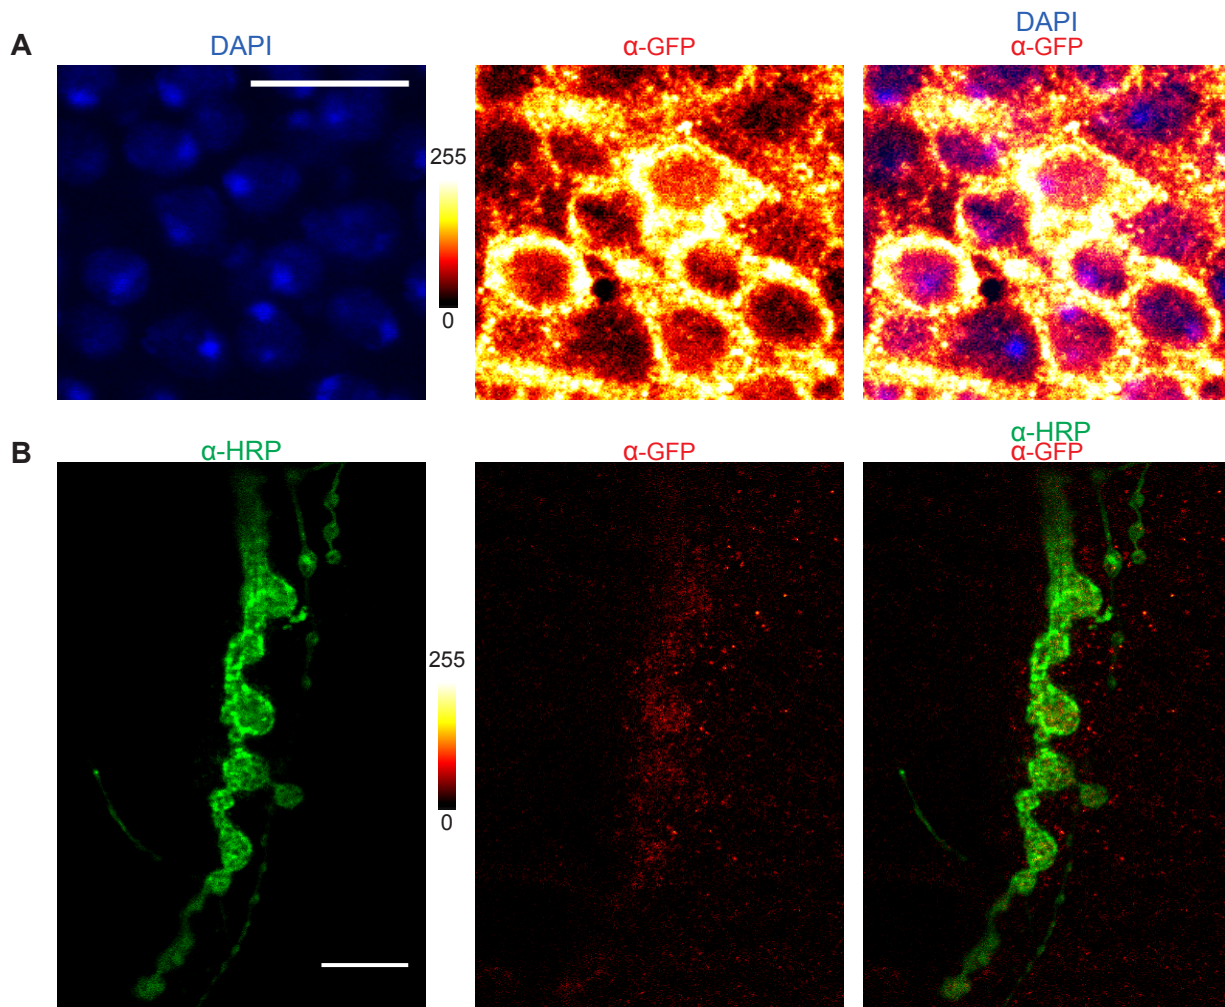

**Figure S4 Related to Figure 3**

## Supplemental Information

### Figure S1 Characterization of the transgenically expressed Epac1-camps sensor in *Drosophila* motor neurons, Related to Figure 1

(A) Efficacy of the adenylyl cyclase inhibitor 2',5'-dideoxyadenosine in *Drosophila* larvae. Motor neurons expressing the Epac1-camps sensors were preincubated with 2',5'-dideoxyadenosine and stimulated with octopamine.  $\Delta$ FRET values were calculated as described in **Figure 1C**. Data are shown as mean  $\pm$  s.e.m. \*\*,  $P < 0.01$  by Student's t-test. (n = 8).

(B) Similar basal cAMP levels in boutons, axon and cell body. *Drosophila* motor neurons were stimulated with 2',5'-dideoxyadenosine.  $\Delta$ FRET values were calculated as described in **Figure 1C**. Data were not statistically different by one-way ANOVA. (n = 8).

(C) Intracellular biosensor concentration does not affect the amplitude of the cAMP response. *Drosophila* motor neurons expressing the Epac1-camps sensors were stimulated with  $10^{-6}$  M forskolin. The amplitude of the response to forskolin was quantified in different regions of the motor neuron (boutons, axon, cell body) as a percentage of the maximal forskolin + IBMX response and plotted against fluorescence intensity. Data are shown as mean  $\pm$  s.e.m. (n = 7).

(D) Intracellular biosensor concentration does not affect the kinetics of the cAMP response. *Drosophila* motor neurons were stimulated with  $10^{-5}$  M octopamine. The rate constant K of cAMP accumulation was calculated using a non-linear regression (monoexponential phase decay) and plotted against fluorescence intensity. Data are shown as mean  $\pm$  s.e.m. (n = 10-21).

### Figure S2 Iontophoretic delivery of octopamine, Related to Figure 2

(A) Linearity of the iontophoretic ejection. The glass microelectrode was filled with the fluorescent dye rhodamine ( $10^{-5}$  M). The amount of dye released upon sequential pulses of 1 s with increasing ejection current was followed by fluorescence microscopy. Data fitted to a linear model. (n = 5).

(B) Range of the delivery of octopamine. Left, YFP images showing the microelectrode gradually moved away from the target bouton. Right, dependency of the FRET changes produced by a test pulse on the distance between pipette and target bouton.  $\Delta$ FRET values calculated as described in **Figure 1C**. This procedure was repeated at the end of each experiment in Figure 2. (n = 10).

(C) Pseudocolor FRET images (YFP/CFP ratios) of the NMJ on muscle 13, before (basal) and after generalized stimulation with a saturating concentration ( $10^{-5}$  M) of the cell-permeable cAMP analog 8-Br-2'-Me-cAMP-AM.

(D) FRET measurement of cAMP changes induced by direct activation of the Epac1-camps sensor with increasing concentrations of 8-Br-2'-Me-cAMP-AM. Shown is a representative trace measured in the region of interest (ROI) depicted in C.

(E) Concentration-response curves obtained from traces like those shown in D, calculated as described in **Figure 1C**. Shaded yellow area represents the cAMP concentration that can activate its downstream target. Scale bar, 5  $\mu$ m. Data are shown as mean  $\pm$  s.e.m. (n = 8).

### **Figure S3 PDE inhibition abolishes the octopamine-induced cAMP gradient, Related to Figure 3**

Semi-intact larval preparations were pre-incubated with the broad PDE inhibitor IBMX ( $10^{-4}$  M) and subsequently stimulated with different concentrations of octopamine. cAMP changes were monitored in boutons, the distal axon and cell body.  $\Delta$ FRET values calculated as described in **Figure 1C**. ns, statistically non-significant differences by one-way ANOVA. Data are shown as mean  $\pm$  s.e.m. (n = 6-10).

### **Figure S4 Subcellular localization of EGFP tagged PDE dunce, Related to Figure 3**

(A) Third instar *Drosophila* larva expressing *dnc-EGFP-dnc* ( $y^1w^+Mi\{PT-GFSTF.2\}dnc^{MI03415-GFSTF.2}$ ). Cell bodies stained with DAPI against neuronal membranes (blue) and with anti-GFP to visualize the Dnc-EGFP-Dnc expression pattern (red hot).

(B) Specificity of the  $\alpha$ -GFP antibody. Third instar wt (Canton-S) *Drosophila* larva. NMJ on muscle 13 stained with  $\alpha$ -HRP against neuronal membranes (green) and with  $\alpha$ -GFP. Scale bar, 10  $\mu$ m.

### **Movie 1 cAMP gradient at the NMJ, Related to Figure 1**

First time derivative analysis of the cAMP changes induced by generalized application of octopamine ( $10^{-5}$  M). Frame interval = 5s. Scale bar, 10  $\mu$ m.

### **Movie2 cAMP signals confined to single synaptic boutons, Related to Figure 2**

First time derivative analysis of the cAMP changes induced by local stimulation of the most distal bouton with octopamine. Frame interval = 300 ms. Scale bar, 10  $\mu$ m.
